# Supplementary material for: Exceptional low-temperature fluorescence sensing properties in novel KBaY(MoO4)3:Yb3+,Ho3+ materials based on FIR of Ho3+ transitions 5F5(1) → 5I8/5S2 → 5I8
Source: Royal Society of Chemistry journal article supplement (doi:10.1039/d2tc01061e), 2022-01-01
Supplement: d2tc01061e1.pdf [file d2tc01061e1.pdf]

## Supporting Information

### Exceptional low-temperature fluorescent sensing properties in novel $\text{KBaY}(\text{MoO}_4)_3:\text{Yb}^{3+},\text{Ho}^{3+}$ materials based on FIR of $\text{Ho}^{3+}$ transitions ${}^5\text{F}_{5(1)} \rightarrow {}^5\text{I}_8/{}^5\text{S}_2 \rightarrow {}^5\text{I}_8$

Kai Li,<sup>ab</sup> Daiman Zhu<sup>c\*</sup>, Changtao Yue<sup>a\*</sup>

<sup>a</sup>College of Science, China University of Petroleum, Beijing, Beijing 102249, China

<sup>b</sup>L<sup>3</sup> – Luminescent Lanthanide Lab, Department of Chemistry, Ghent University, Krijgslaan 281-S3, B-9000 Ghent, Belgium

<sup>c</sup>Department of Materials Engineering, Leuven University, 3001 Leuven, Belgium

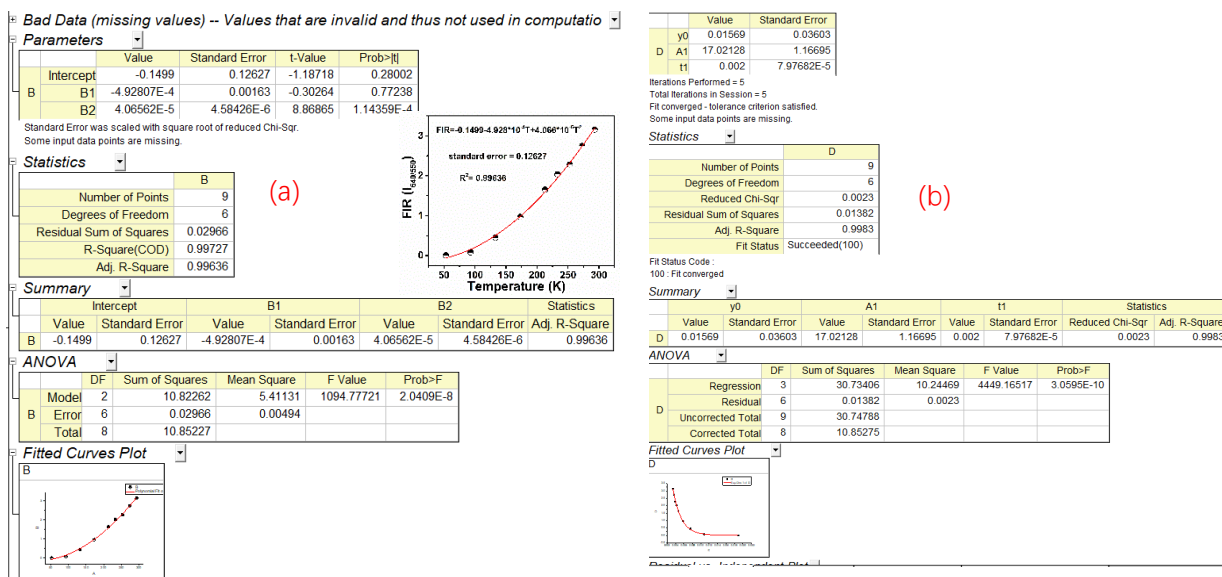

**Fig. S1** The fitting results for the  $\text{FIR}(I_{640/550})$  vs temperature (K) using polynomial (a) and exponential (b) functions, respectively, inset in (a) is the variation of  $\text{FIR}(I_{640/550})$  values for  $\text{KBaYMO:0.60Yb}^{3+},0.01\text{Ho}^{3+}$  as a function of temperature and corresponding fitting curve for them using polynomial function.
